# Supplementary material for: Genome Rearrangements Detected by SNP Microarrays in Individuals with Intellectual Disability Referred with Possible Williams Syndrome
Source: PubMed Central journal article supplement (PMC2930846; doi:10.1371/journal.pone.0012349), 2010-08-31
Supplement: pone.0012349.s001.pdf [file pone.0012349.s001.pdf]

**Table S1. Primers Used for Amplification of Deletion Junctions and Sequences Flanking Breakpoints**

| Case # | Chromosome Abnormality                     | Forward Primer (5'-3')  | Reverse Primer (5'-3')  | Breakpoint Sequence                                                                                                                                                                                                                                                                                                                                                                                                                                                                                       |
|--------|--------------------------------------------|-------------------------|-------------------------|-----------------------------------------------------------------------------------------------------------------------------------------------------------------------------------------------------------------------------------------------------------------------------------------------------------------------------------------------------------------------------------------------------------------------------------------------------------------------------------------------------------|
| 8705   |                                            | TGGTGGGGAAATCACATTATT   | CATTAAGGACACAAAGCTGTAAA | Chr 7q22.1 + AGGGGGGATTTGAACAAGAAAAACCCCGTGCATCGGAAAAGTGGCTCTTACATATCTCAAATCTAAAGGAAGTTTGTGTTGTTGT LCR(TTG)<br>/G/<br>Chr 7q31.31 + AAGTGAAGGAAACATAAAGACAAAGTTCTTGAATGAATTAATTTGTATATTTGATAAAGACAAAGTCCATTGTATTCTAAGCCTGGCACAGA L2                                                                                                                                                                                                                                                                       |
| 8399   | Del(7)(q11.22q21.11)*                      | CCAGAGGGCACATTGCTATT    | CCCATTACGTTTGCAATGA     | Chr 7q11.22 + CAATTCAGTTTTTGTCTGGTTGATGGTTAGTGGAAACGGTAGTAAAGCACATCTCCTTGTAACTCTTTGGTTAAAAGAGATGAGGGATGTTGCAC/ Unique<br>Chr 7q21.11 + ATAACTCCAGATAAAGACTATCAAGAAGATAGATGGTAGCACCCAGGACTGTCCAAGTAGACGTGAAAACCCAGATGATGGTTCTTTTTAGGCATATT Unique                                                                                                                                                                                                                                                          |
| 9101   | Del(5)(p15.2p14.3)<br>/ Inv(5)(p14.3p14.2) | TGCAGCCTCAAAGCTTG       | GTGGCCCACTGGAAGTAAGA    | Chr 5p15.2 + AGTAAGCTACTACTACGCTTCTGACTTGGGAATTTTGTCTTTAAAGAAAACCAAGTGTGCAGAAGTAAGAGTTAATTTATTTAAAGACTAGTACTA Unique<br>/A/<br>Chr 5p14.2 - ACTAAGTTGATCACAGTAAGGACCTCCTCATGCCTCAAGGCAGAAATTTCCAAAATATATGCTGTGCTCAGCTTTGGTCACTTTGTTGAATTGCATATAT Unique<br>Chr 5p14.3 - AAATGTTGAATAATTTTATATAGACACTTTAATAGAGTTCTCAGTTGTGGAGTATGCTTCTCTAATATTAAGAGCCTAATATATACTGGCCTTTCT/ Unique<br>Chr 5p14.2 + CCTTAGTAGGTGTTCAATTTCCAGATCCCTTGGCAATTAGAAGTTGTAGCCTGACCATAGTGTATGTTTTTCAATTTATCCCTTCTCATTGCCAAGG Unique |
| 9061   | Del(7)(q11.23q11.23)a*                     | TCTTCTCGCTTACATCT       | TCCCAATAAGCAGTGAGG      | Chr 7q11.23 + GCTCACACCTGTAATCCAGCACCTTTGGGAGGCTAGTGGTGAATAACGAGGCCAGGAGATCAAGACCAGCCTGCCAACATGGTGAACCCCGTCTCC AluSc<br>/ACTAAAAATACAAAA/<br>Chr 7q11.23 + ATTAGCTGGGTGTGGTGGCGCATGCCATAGTCCAGCTACTCAGGAGGCTGAGACACAAGAACTACTTGAGCCCGGAGGCGAAGGTTGTAGGGAGCTG AluSx                                                                                                                                                                                                                                        |
| 9101   | Del(7)(q11.23q11.23)b                      | CAGCAGAACGACGCCGCCGACAA | CTTGGCAGGCAATAGTCACTT   | Chr 7q11.23 + ATTTAAACCATTTGAAGATGAAGAGTCTATTTTAGAGTACTGAGTAAATTTGATGGAACATAACACACACGCAATACATGTAAGAACTGGTAGAAC LCR(L1MD2)<br>/CTG/<br>Chr 7q11.23 + AGGCAGGAGAGTGGCATGAACCCAGGAAGTGGAGCTAGCAGTGAAGTATGATCATGCCACTGCACTCCAGCCTGGGTGACAGAGCGAGACTCCGCTCTCAA AluYd8                                                                                                                                                                                                                                          |
| 9239   | Del(5)(q15q15)*                            | TCCTGGCTAACAGATTGTTG    | TCAGGAGACTGAATTTTGAGAA  | Chr 5q15 + AAATGGTTAAAAGCCACAATAAAAAGACACAGACTTGCAAATGGATAAAGAGTCAAGACCCATTAGTGGGCTGATTCGGGAGACCCATCTCACGTGC L1PA7<br>/AAA/<br>Chr 5q15 + TTTGCCCTCCTACCTTTTTTTGTTCTATTAGGCTCAATTTATGAATAATGAGGGAAGATCTCTTTACTCAGTCTCTGATTCAAATGCTAATCACT LTR MLT2B2                                                                                                                                                                                                                                                      |
| 9152   | Del(7)(q11.23q11.23)c                      | GATGGCAGTTGACTACCT      | ATCTGGTCTGCTCAGCTA      | Chr 7q11.23 + TTTTAAGACGAGTCTGTCTCTGTGCCAGGCTGGAGTACAGTACCTGATCTCGGTTCTCCGACGCTCCGCTCTGGGTTCAAGTATTCTCTGCTC AluSx<br>/CTCA/<br>Chr 7q11.23 + AGTCTGGCCGGCGCAGTGGCTCACGCTGTAATCCAGCACCTTTGGGAGGCAAGGCAGGTGATCACAAGTCAAGGAGTTCAAGACCAGCCTGGCCAA LCR(AluSg)                                                                                                                                                                                                                                                  |

Sequences show 100bp flanking chromosome abnormalities and their observed orientations. Shared or inserted bases at junctions are shown on middle line. Breakpoints are indicated by /, inserted bases are shown in bold, regions of sequence identity are italicized, and sequence present at both breakpoints of chromosome 5p rearrangement are underlined. Type of repetitive sequence is shown to right. Forward primers for amplification of 9101 5p14.3 and 7q11.23 sequences are complementary to adaptor used for adaptor ligation mediated PCR walking [Padegimas & Reichert]. \* denotes deletions cloned directly from SNP copy number data
