# Supplementary material for: Genome Rearrangements Detected by SNP Microarrays in Individuals with Intellectual Disability Referred with Possible Williams Syndrome
Source: PubMed Central journal article supplement (PMC2930846; doi:10.1371/journal.pone.0012349), 2010-08-31
Supplement: pone.0012349.s002.pdf [file pone.0012349.s002.pdf]

**Table S2. Primer Sequences for qPCR Assays**

| <b>Proband</b>               | <b>Chromosome Abnormality</b>     | <b>Primer Set</b>         | <b>Forward Primer (5'-3')</b> | <b>Reverse Primer (5'-3')</b> |
|------------------------------|-----------------------------------|---------------------------|-------------------------------|-------------------------------|
| <b>8293</b>                  | <b>Dup (1)(p36.11p35.3)</b>       | qNUDC_1                   | GTAAGAACCGTCGCAAATATCGTG      | TCCCCTACCACACACATTCCG         |
|                              |                                   | qNUDC_2                   | TGATAGGAGGGAAGGGGTAAC         | CTGGCATTGTTTTCTGTAGGT         |
|                              |                                   | qNUDC_3                   | GATAGCTGTTTGCCTTTTCAGATG      | CCTCTGCACTGCATATTTTCTCAT      |
|                              |                                   | qSLC9A1_1                 | AGCCAGGGGTTTTCAAATGTT         | CCAGAATGTGCTGCCTTTTTAAGT      |
|                              |                                   | qEYA3_1                   | CAAGGGGAAGGCTCCTCATT          | CACCAGGCTTTAGAGCTTGATTT       |
|                              |                                   | qEYA3-EX8                 | GTTTGAGATGCTGGCTACTGC         | CACAAATGCCAGCCTGATATCT        |
|                              |                                   | qEYA3-EX7                 | ATAATGTGCTGGGCTTGGC           | TCCATCTCCAAGTCAACACAGT        |
| <b>9148</b>                  | <b>Dup (2)(p22.1p16.1)</b>        | q9148_1                   | ATGCACCCAGCCACTGCTAG          | TTATCTGCTCCCAGCCAAGTG         |
|                              |                                   | q9148_2                   | TGAAGCTCTGCTGCTTGTATTATG      | GACTTCCCAGAGTTCCTGTCTTAT      |
|                              |                                   | q9148_3                   | ATTTTCCCAGGGACTTAGATTTT       | CTGTCAAGTGGTAAAAGGGTTCAG      |
|                              |                                   | q9148_4                   | CAGTGGGCAAATGGAGAAA           | TGCTGAACAATATTCCATTGTGA       |
|                              |                                   | q9148_5                   | GATTCCCCTCTTCCAAGTAACAT       | AGGGTCCAAAGGGCTCAATAT         |
|                              |                                   | q9148_6                   | CCATTCTCTGAATCCACAGAAA        | AAGTTTCCAGGGGTGTTCATAC        |
| <b>8772</b>                  | <b>Mosaic Del (2)(p11.2p11.2)</b> | q8772_LCR1                | ACCCCACTACATATCCCCAAGAT       | AAATGACTTCCTAGGGAAGGAGC       |
|                              |                                   | q8772_LCR3                | TTTAATGTTGGTGTGAACAGTGG       | CGTAGGGGCTACAAGATGCTATTT      |
|                              |                                   | q8772_LCR5                | CAGGGCCTCGAGCCACTT            | ACCGTGCCTGTGTGCTGG            |
|                              |                                   | q8772_LCR7                | CCCCTGCCTGTGGCACCT            | CCATGGAGAGGGCAGCTGG           |
|                              |                                   | qCD8A_1                   | TGCGCACAACAGTATTGTGAC         | TGACGGGAAACAAAAGTAGGTAA       |
|                              |                                   | qCD8B_1                   | GGTCTTTAGGATTTTGGGCAAATT      | CCCTTGTGGAACCAAATGTATC        |
|                              |                                   | qMGC4677_1                | CGTAGGAAGGCTTGGGGTTAA         | ACTTACATAAGGGCGGCATCC         |
|                              |                                   | q8772telo_1               | AGCTCCAGGGTTGCTTCTCAC         | ATGCCTCTGCTTGGGTTGTC          |
|                              |                                   | qKRCC1_1                  | GCAAAGGTCATTAATCCTCCAAT       | AAATTGCTTTGATGGTGGAAATA       |
|                              |                                   | qRPIA_2                   | AATTTTTAGTCACAAGCCTAGCTG      | GACATCTGAAGTTGAAGCTATTGA      |
|                              |                                   | qRPIA_3                   | AAAAGGCTTTAGATTTGTCAATCG      | CCCAAAGCAAAAAGAGACTCAA        |
|                              |                                   | qIGKC_3                   | ATCAGCTGTGTTACTACGGAGTGC      | CCATTTCCCCTCCCTCATCT          |
|                              |                                   | qIGKC_1                   | TTGCCACACTCCCCTGAG            | CTGCCCTCTCCAGTGTGTCATG        |
|                              |                                   | qIGKC_2                   | TGAGCAACTTTTCATAATTTCTCTT     | AAGAGTTCCCTTGTGGCTAATAAA      |
| <b>9101</b>                  | <b>Del (5)(p15.2p14.3)</b>        | q9101-5p15_16             | GCAAAAATATAATGACCCCAAAT       | TGAATTGATCACACTGCTTAGAGA      |
|                              |                                   | q9101-5p15_18             | TCACCAAGCCTACGTAATGGA         | TCTGGTATTTGGGATTTTCTATCT      |
|                              |                                   | q9101-5p15_20             | GTGTGGACTCATTTCCTGGAGATA      | CTGAGACTTTAGCAGGCAACAGG       |
|                              |                                   | q9101-5p15_11             | AGAATTTTTCCCTGTTGAAACTCA      | GCCAACTGTTTGAGCTGCTAAT        |
|                              |                                   | q9101-5p15_10             | GCTATGAAAGAAAAAGGCAGAGG       | TGCATGTTTGTACCTTTGTTGTC       |
| <b>Del (7)(q11.23q11.23)</b> | q9101-7q11_1                      | TTTGCACCAAATGTAACGATAAA   | CAAGTCATGCAAGAATCCTGTTA       |                               |
|                              | q9101-7q11_2                      | GCATACCTATAACAAAGGCCAAGA  | TTAATGGACAACAAACCAGTGAA       |                               |
|                              | q9101-7q11_3                      | ATCAAATGCTATAAAAAATCGTCAT | CTTTTGATCTATTCCCCTAAGGTT      |                               |
|                              | q9101-7q11_4                      | TAAAAGGAGGACAGAAACACATGG  | TGTGGGTGTGTGAAAATGGAGTA       |                               |

**Supplemental Table 1. Primer Sequences for qPCR Assays (continued)**

|                                  |                                   |                               |                                 |                      |
|----------------------------------|-----------------------------------|-------------------------------|---------------------------------|----------------------|
| <b>Del (7)(q11.23q11.23)</b>     | q9101-7q11_5                      | TTTATGATTTGGATTGCCAATTGA      | AGGCAGATTTTTTTTTCTGGCAGTA       |                      |
|                                  | q9101-7q11_6                      | CAACAGTGCCATGTTCACTAAGA       | ACGCCTACTCCATTTATCCAAA          |                      |
|                                  | q9101-7q11_7                      | AATACAAATGCCACAAAGATGC        | TAGTGTTGAGAGTGCTTTAAAAAA        |                      |
|                                  | q9101-7q11_8                      | TGAGTACTACACAAGGGTTCATGC      | ATGGGGCTTTCTACAAGGCATA          |                      |
|                                  | q9101-7q11_9                      | GAGGTCCGAAGATGAGAAAGCA        | CCAACCCAGCTGGATCATTTA           |                      |
|                                  | q9101-7q11_10                     | GGAGCACAGGAAATCACTGTCA        | TGGTGCTGTTGTTCTGATGA            |                      |
|                                  | q9101-7q11_11                     | GCCAAATCTTTGAGGGATTCT         | TGTGGGAGATCCTTTATTCTCTG         |                      |
|                                  | q9101-7q11_12                     | GGGGAGGGAAATGGATTTGAGT        | CCTGGAATATCCTTTCCTGTCT          |                      |
|                                  | q9101-7q11_13                     | ACCCACTGCCTGAATGTA AAA        | TTAGGCCATGGATTTCTTTGAA          |                      |
|                                  | q9101-7q11_14                     | GGGGCCAGAGATGTAATGTGT         | CTTGGCAGGCAATAGTTCACTT          |                      |
|                                  | q9101-7q11_15                     | TGGATAAATGGAGTAGGCGTACTT      | AAAATGTCTGGGCAGTAAATAAA         |                      |
|                                  | <b>9152 Del (7)(q11.23q11.23)</b> | q9152_1                       | ACAGGAATCTCAGGCATGTGGT          | AGGGTCTGGCTTTTGGAAAC |
|                                  |                                   | q9152_2                       | CCAGTCTGTTGAGTCCATGAGAA         | AGGCGGGAATGTGGCAAG   |
|                                  |                                   | q9152_3                       | CCTCCACATGGAGCAGAGTTAAAG        | ACAGGCAGTGACCCAGTGTT |
|                                  |                                   | q9152_4                       | GTGTGAGGGAGGGCAGAATGT           | GGCCCGTGGTATCATTCTCT |
| q9152_5                          |                                   | TTGGTCATTATTTATGAAAGTGGT      | AATAAGACCCTACCCTCCAAAAAT        |                      |
| q9152_6                          |                                   | TGTGCCCTGATGCCTCTATT          | CACCACAGGCAGACTGGA              |                      |
| q9152_7                          |                                   | ACCTGGTTGCCCTTCAGGA           | TACCCTCCATCAGACGCAGAGA          |                      |
| q9152_8                          |                                   | ACGTGCCACTGCGGTTGT            | TGTGATAAGGGGAGGCATTCTG          |                      |
| q9152_9                          |                                   | GTAGCGGTCAGCATGGGTAT          | CCCTCAACCCCCAGAGATT             |                      |
| q9152_10                         |                                   | AGCCTTCCAACAGGTGAGGAG         | TTGACAGATGTCAGCCGAGCC           |                      |
| q9152_11                         |                                   | GGTTAAGCAGGAGGGGCTCT          | TAGGATGACAGCAGATCTCCC           |                      |
| qGTF2I_6                         |                                   | AGTTCGTTTATGATGAGTGGCAGTT     | ACACAAGGTAAATAATTAGACAGTGATTGCA |                      |
| qGTF2I_7                         |                                   | TGGGAAGTTTGTATTTACCTGATAAGTTT | CCCAGCACATCCA ACTATTACCA        |                      |
| qGTF2I_8                         | GGAACATATGGAAACATGCTTAATAATG,     | CAGGGTCCTCACTTGTCTGAA         |                                 |                      |
| <b>8464 Dup (16)(p12.2p11.2)</b> | qCDR2                             | GCCGGTTTCTCCTGGTCAC           | GCCAAGTGGAGGAGCTGAAGT           |                      |
|                                  | qATXN2L                           | TACCCAGATGTTGAAGGGATTA AA     | AAACATTTCAACAAGTCCAATCAC        |                      |
|                                  | qZP2                              | TCTCTTACCTGGGTAGCTTTGC        | TCAGTGAAGTTGGGTCCATTT           |                      |
|                                  | qIGSF6                            | ACCTGTGTCCCCAGACGA            | GCTGCTCATAGGCTCCATCA            |                      |
|                                  | qCLN3                             | GGGCCTCGGTTCTTATGA            | GGAGGGGAAGAAGAAGCAGA            |                      |
