# Supplementary material for: Genome Rearrangements Detected by SNP Microarrays in Individuals with Intellectual Disability Referred with Possible Williams Syndrome
Source: PubMed Central journal article supplement (PMC2930846; doi:10.1371/journal.pone.0012349), 2010-08-31
Supplement: pone.0012349.s004.pdf [file pone.0012349.s004.pdf]

**Table S4. Clinical findings in probands with genome rearrangements**

| Proband                                             | Genetic Findings                                                                  | Age (yrs) | Sex | Growth        | OFC   | Cognition     | Behavior | Neurological                                         | Craniofacial                                                                                                                                                         | Cardiac                        | Musculo-skeletal                           | Other                                                                                |
|-----------------------------------------------------|-----------------------------------------------------------------------------------|-----------|-----|---------------|-------|---------------|----------|------------------------------------------------------|----------------------------------------------------------------------------------------------------------------------------------------------------------------------|--------------------------------|--------------------------------------------|--------------------------------------------------------------------------------------|
| <b>(A) Probands with known rearrangements</b>       |                                                                                   |           |     |               |       |               |          |                                                      |                                                                                                                                                                      |                                |                                            |                                                                                      |
| 8399                                                | Del (7)(q11.22q21.11)                                                             | 7         | F   | NL            | NL    | Severe ID     | ADHD     | Seizure disorder, wide-based gait, hyper-reflexia LE | Ptosis, strabismus, periorbital fullness, flat mala, full cheeks, wide mouth, full lips                                                                              | Pulmonic stenosis              | Tight heel cords                           | Chronic otitis media, chronic constipation, Inguinal hernia                          |
| 9061                                                | Del (7)(q11.23q11.23)                                                             | 1         | F   | NL            | NL    | NA            | NA       | NL                                                   | NL                                                                                                                                                                   | SVAS                           | NL                                         |                                                                                      |
| 9101                                                | Del (5)(p15.2p14.3), Inv(5)(p14.3p14.2), Del(7)(q11.23q11.23), t(7;11)(q21.1:p14) | 0.5       | M   | Short stature | Micro | DD            | NA       | Central hypotonia, peripheral hypertonia             | Stellate iris, short nose, broad nasal tip, flat midface                                                                                                             | SVPS, bicuspid pulmonary valve | No joint laxity                            | GERD laryngomalacia, transient mild hypercalcemia                                    |
| 9164                                                | Del (1)(q21.1q21.1) Dup (7)(q11.23q11.23)                                         | 8         | M   | Short stature | Micro | Borderline IQ | ADHD     | Mild dyskinesia, some symptoms of CAS                | Facial asymmetry, upslanted palpebral fissures, long columnella, micrognathia, high arched palate                                                                    | NL                             | mild brachydactyly                         | high pain tolerance, asthma, missing 3 permanent teeth, single palmar flexion crease |
| <b>(B) Probands with unsuspected rearrangements</b> |                                                                                   |           |     |               |       |               |          |                                                      |                                                                                                                                                                      |                                |                                            |                                                                                      |
| 9239                                                | Del (5)(q15q15)                                                                   | 2.5       | M   | NL            | Micro | DD            | ADHD     | Hypotonia, persistent primitive reflexes, poor sleep | Short palpebral fissures, supraorbital fullness, short nose, anteverted nares, high arched palate, wide mouth with bowed upper lip, protruding lower lip             | NL                             | NL                                         | Inguinal hernia, Immunoglobulin deficiency                                           |
| 9152                                                | Del (7)(q11.23q11.23)                                                             | 3.75      | F   | NL            | NL    | DD            | ADHD     | Hypotonia                                            | Mild facial asymmetry & right occipital flattening secondary to torticollis (resolved), stellate iris pattern, high arched palate, small squared pinna (length 5th%) | NL                             | NL                                         | NA                                                                                   |
| 8772                                                | Mosaic Del (2)(p11.2p11.2)                                                        | NA        | F   | NA            | NA    | NA            | NA       | NA                                                   | NA                                                                                                                                                                   | NA                             | NA                                         | Lost to follow-up                                                                    |
| 8293                                                | Dup (1)(p36.11p35.3)                                                              | 20        | M   | NL            | Macro | Mild ID       | NL       | Hypotonia                                            | Upslanting palpebral fissures, high arched palate, low posterior hairline, small ears                                                                                | NL                             | Large hands, kyphosis                      | Hoarse voice, constipation, esotropia                                                |
| 9148                                                | Dup (2)(p22.1p16.1)                                                               | 15        | F   | Short stature | Micro | Moderate ID   | ADD, OCD | Poor balance, poor fine motor skills                 | Short palpebral fissures, high arched palate, dental crowding, micrognathia                                                                                          | NL                             | Pectus carinatum, thin fingers             | NA                                                                                   |
| 8464                                                | Dup (16)(p12.2p11.2)                                                              | 20        | M   | Short stature | NL    | Mild ID       | GAD      | Hypotonia                                            | Broad forehead, short philtrum, wide mouth, full lips                                                                                                                | ASD                            | Joint laxity, tight hamstrings, pes planus | Chronic otitis media, Inguinal hernia                                                |

Abbreviations: M, male; F, female; NL, normal; NA, not available; OFC, orbitofrontal circumference: micro, microcephaly; macro, macrocephaly; ID, intellectual disability; DD, developmental delay; ADD, attention deficit disorder; ADHD, attention deficit hyperactivity disorder; GAD, generalized anxiety disorder; OCD, obsessive-compulsive disorder; CAS, childhood apraxia of speech; LE, lower extremities; SVAS, supraaortic stenosis; SVPS, supraaortic pulmonary stenosis; ASD, atrial septal defect; GERD, Gastroesophageal reflux.
