# Supplementary material for: Genome Rearrangements Detected by SNP Microarrays in Individuals with Intellectual Disability Referred with Possible Williams Syndrome
Source: PubMed Central journal article supplement (PMC2930846; doi:10.1371/journal.pone.0012349), 2010-08-31
Supplement: pone.0012349.s005.pdf [file pone.0012349.s005.pdf]

**Table S5. List of statistically identified CNVs**

| Chromosome | Start position | End position | Size (kb) | Type        | Refseq genes | Includes exon | Previously reported CNV |
|------------|----------------|--------------|-----------|-------------|--------------|---------------|-------------------------|
| 1          | 26948697       | 28023399     | 1074.70   | Gain        | 24           | Y             | N                       |
| 1          | 63729851       | 63837565     | 107.71    | Gain        | 2            | Y             | N                       |
| 1          | 72258884       | 72374107     | 115.22    | Loss        | 1            | N             | Y                       |
| 1          | 97794409       | 98009752     | 215.34    | Loss        | 1            | Y             | Y                       |
| 1          | 102395713      | 102556188    | 160.48    | Loss        | 0            | N             | Y                       |
| 1          | 104304648      | 104515175    | 210.53    | Gain        | 0            | N             | N                       |
| 1          | 109401356      | 109466760    | 65.4      | Loss        | 1            | Y             | N                       |
| 1          | 143570846      | 144923027    | 1352.18   | Loss        | 10           | Y             | N                       |
| 1          | 216629257      | 216789404    | 160.15    | Gain        | 3            | Y             | N                       |
| 2          | 695636         | 912174       | 216.54    | Gain        | 1            | Y             | Y                       |
| 2          | 35734672       | 35997258     | 262.59    | Loss        | 0            | N             | Y                       |
| 2          | 40200748       | 57361886     | 17161.14  | Gain        | 66           | Y             | N                       |
| 2          | 87595428       | 88961243     | 1365.82   | Mosaic loss | 11           | Y             | N                       |
| 2          | 88991630       | 89170082     | 178.45    | Both        | 0            | N             | Y                       |
| 2          | 89740700       | 89958350     | 217.65    | Loss        | 0            | N             | Y                       |
| 2          | 96206808       | 96258386     | 51.58     | Gain        | 2            | Y             | N                       |
| 2          | 97175459       | 97478937     | 303.48    | Loss        | 2            | Y             | Y                       |
| 2          | 110205175      | 110337721    | 132.55    | Loss        | 2            | Y             | Y                       |
| 3          | 19217997       | 19288605     | 70.61     | Gain        | 1            | Y             | N                       |
| 3          | 75535509       | 75627862     | 92.35     | Loss        | 0            | N             | Y                       |
| 3          | 147877590      | 148299630    | 422.04    | Gain        | 0            | N             | N                       |
| 3          | 169472632      | 169640335    | 167.7     | Gain        | 0            | N             | N                       |
| 4          | 59713          | 106981       | 47.27     | Gain        | 2            | Y             | Y                       |
| 4          | 93226702       | 93461993     | 235.29    | Gain        | 0            | N             | N                       |
| 4          | 93857899       | 93865520     | 7.62      | Gain        | 1            | N             | N                       |
| 5          | 752190         | 815465       | 63.28     | Loss        | 0            | N             | Y                       |
| 5          | 771021         | 815465       | 44.44     | Gain        | 0            | N             | Y                       |
| 5          | 11665493       | 19050273     | 7384.78   | Loss        | 11           | Y             | N                       |
| 5          | 29691322       | 29780415     | 89.09     | Loss        | 0            | N             | N                       |
| 5          | 63639566       | 63774328     | 134.76    | Gain        | 0            | N             | N                       |
| 5          | 93053757       | 95627006     | 2573.25   | Loss        | 14           | Y             | N                       |
| 6          | 12156242       | 12355596     | 199.35    | Gain        | 1            | Y             | N                       |
| 6          | 26936643       | 27056174     | 119.53    | Loss        | 0            | N             | Y                       |
| 6          | 31461668       | 31559455     | 97.79     | Loss        | 2            | Y             | Y                       |
| 6          | 168174708      | 168401562    | 226.85    | Gain        | 3            | Y             | Y                       |
| 7          | 7621327        | 7807665      | 186.34    | Loss        | 1            | Y             | N                       |
| 7          | 7964390        | 8301108      | 336.72    | Gain        | 2            | Y             | N                       |
| 7          | 31648115       | 31749521     | 101.41    | Both        | 1            | Y             | N                       |
| 7          | 38076360       | 38178211     | 101.85    | Loss        | 1            | Y             | Y                       |
| 7          | 38084338       | 38092618     | 8.28      | Gain        | 1            | Y             | Y                       |
| 7          | 53249866       | 53347121     | 97.26     | Loss        | 0            | N             | Y                       |
| 7          | 57216002       | 57453047     | 237.05    | Gain        | 0            | N             | Y                       |
| 7          | 64174103       | 64512781     | 338.68    | Loss        | 1            | Y             | Y                       |
| 7          | 69688551       | 80480873     | 10792.32  | Loss        | 73           | Y             | N                       |
| 7          | 72000962       | 76605168     | 4604.21   | Loss        | 57           | Y             | N                       |
| 7          | 72200171       | 73734580     | 1534.41   | Both        | 25           | Y             | N                       |
| 7          | 72467403       | 72970254     | 502.85    | Loss        | 12           | Y             | N                       |
| 7          | 73582532       | 75712811     | 2130.28   | Loss        | 27           | Y             | Y*                      |
| 7          | 85140643       | 85211420     | 70.78     | Gain        | 0            | N             | Y                       |
| 7          | 141528640      | 141941760    | 413.12    | Loss        | 0            | N             | Y                       |
| 8          | 6986630        | 8145978      | 1159.35   | Gain        | 12           | Y             | Y                       |
| 8          | 7222992        | 8106541      | 883.55    | Loss        | 12           | Y             | Y                       |
| 8          | 8164047        | 8182933      | 18.89     | Both        | 0            | N             | Y                       |
| 8          | 85484560       | 85528233     | 43.67     | Loss        | 1            | N             | N                       |
| 8          | 137757137      | 137931617    | 174.48    | Loss        | 0            | N             | Y                       |
| 9          | 251855         | 267989       | 16.13     | Gain        | 1            | Y             | Y                       |
| 9          | 11942128       | 12051706     | 109.58    | Loss        | 0            | N             | Y                       |
| 9          | 28497002       | 28667724     | 170.72    | Loss        | 1            | N             | Y                       |

|    |           |           |         |      |    |   |   |
|----|-----------|-----------|---------|------|----|---|---|
| 9  | 31058070  | 31138008  | 79.94   | Gain | 0  | N | N |
| 9  | 40073195  | 43847424  | 3774.23 | Gain | 5  | Y | Y |
| 10 | 35046074  | 35120667  | 74.59   | Loss | 1  | N | N |
| 10 | 46363383  | 46557002  | 193.62  | Loss | 3  | Y | Y |
| 10 | 46363383  | 47162951  | 799.57  | Gain | 5  | Y | Y |
| 10 | 46397572  | 46557002  | 159.43  | Gain | 2  | Y | Y |
| 10 | 47062478  | 47143807  | 81.33   | Gain | 0  | N | Y |
| 10 | 59192085  | 59403275  | 211.19  | Gain | 0  | N | Y |
| 10 | 135158836 | 135264575 | 105.74  | Gain | 2  | Y | Y |
| 10 | 135176625 | 135238107 | 61.48   | Loss | 1  | Y | Y |
| 11 | 4085062   | 4133078   | 48.02   | Gain | 1  | Y | Y |
| 11 | 51049446  | 51318418  | 268.97  | Gain | 1  | Y | N |
| 11 | 80981836  | 81131219  | 149.38  | Loss | 0  | N | Y |
| 11 | 84140727  | 84214566  | 73.84   | Loss | 1  | N | N |
| 11 | 84211479  | 84214566  | 3.09    | Gain | 1  | N | N |
| 11 | 84211479  | 84233615  | 22.14   | Loss | 1  | N | N |
| 11 | 134060736 | 134367660 | 306.92  | Gain | 0  | N | Y |
| 12 | 7908745   | 8033723   | 124.98  | Gain | 2  | Y | Y |
| 12 | 31169298  | 31282170  | 112.87  | Gain | 1  | Y | Y |
| 12 | 31247316  | 31279220  | 31.9    | Gain | 1  | Y | Y |
| 12 | 72561457  | 72795885  | 234.43  | Gain | 0  | N | N |
| 12 | 72638877  | 72801220  | 162.34  | Loss | 0  | N | N |
| 13 | 42393686  | 42675338  | 281.65  | Gain | 2  | Y | N |
| 13 | 42447586  | 42632690  | 185.1   | Gain | 2  | Y | N |
| 13 | 42564370  | 42586916  | 22.55   | Loss | 1  | Y | N |
| 13 | 90860332  | 91099862  | 239.53  | Loss | 1  | Y | N |
| 13 | 91085865  | 91089064  | 3.2     | Loss | 1  | N | N |
| 14 | 19272965  | 19492423  | 219.46  | Gain | 6  | Y | Y |
| 14 | 19309319  | 19492423  | 183.1   | Loss | 5  | Y | Y |
| 14 | 21338108  | 22045568  | 707.46  | Loss | 0  | N | Y |
| 14 | 21929710  | 22016220  | 86.51   | Loss | 0  | N | Y |
| 14 | 44824833  | 44924986  | 100.15  | Loss | 0  | N | Y |
| 14 | 51669842  | 51846098  | 176.26  | Gain | 1  | Y | N |
| 14 | 105149735 | 106356482 | 1206.75 | Loss | 0  | N | Y |
| 14 | 105149735 | 105170875 | 21.14   | Gain | 0  | N | N |
| 14 | 105829129 | 106250892 | 421.76  | Loss | 0  | N | N |
| 14 | 105988336 | 106044701 | 56.37   | Loss | 0  | N | Y |
| 14 | 106223861 | 106246130 | 22.27   | Gain | 0  | N | Y |
| 15 | 18711364  | 20329239  | 1617.88 | Gain | 6  | Y | Y |
| 15 | 19821421  | 20335459  | 514.04  | Loss | 4  | Y | Y |
| 15 | 19827281  | 20329239  | 501.96  | Gain | 4  | Y | Y |
| 15 | 20329239  | 20686315  | 357.08  | Gain | 4  | Y | Y |
| 15 | 22140119  | 22299861  | 159.74  | Gain | 0  | N | Y |
| 15 | 28393128  | 28864940  | 471.81  | Loss | 2  | Y | Y |
| 15 | 56927621  | 57051456  | 123.84  | Loss | 2  | Y | N |
| 15 | 82618970  | 82889733  | 270.76  | Loss | 0  | N | Y |
| 15 | 82878742  | 82892291  | 13.55   | Gain | 0  | N | Y |
| 15 | 99536223  | 99708384  | 172.16  | Gain | 4  | Y | Y |
| 16 | 18152877  | 18728692  | 575.82  | Gain | 4  | Y | Y |
| 16 | 21441805  | 29265851  | 7824.05 | Gain | 69 | Y | N |
| 16 | 34307201  | 34614572  | 307.37  | Gain | 0  | N | Y |
| 16 | 85527980  | 85609265  | 81.29   | Loss | 0  | N | Y |
| 17 | 1130370   | 1900332   | 769.96  | Gain | 19 | Y | N |
| 17 | 20549240  | 20575451  | 26.21   | Gain | 0  | N | Y |
| 17 | 41006823  | 41011471  | 4.65    | Gain | 0  | N | Y |
| 17 | 41006823  | 41015120  | 8.3     | Loss | 0  | N | Y |
| 17 | 41006823  | 41015664  | 8.84    | Gain | 0  | N | Y |
| 17 | 41521621  | 41719833  | 198.21  | Gain | 1  | Y | Y |
| 17 | 41536766  | 41708649  | 171.88  | Loss | 1  | Y | Y |
| 18 | 17131449  | 17144202  | 12.75   | Loss | 0  | N | N |
| 18 | 64126718  | 64251503  | 124.79  | Gain | 0  | N | Y |

|    |          |          |        |      |   |   |   |
|----|----------|----------|--------|------|---|---|---|
| 18 | 72892105 | 73087926 | 195.82 | Gain | 1 | Y | N |
| 19 | 56977641 | 57296437 | 318.8  | Gain | 8 | Y | Y |
| 20 | 14653888 | 14856035 | 202.15 | Loss | 1 | N | Y |
| 20 | 14729684 | 14771472 | 41.79  | Loss | 1 | N | Y |
| 21 | 24608865 | 24705724 | 96.86  | Gain | 0 | N | N |
| 22 | 21053688 | 21546762 | 493.07 | Loss | 0 | Y | Y |
| 22 | 21387732 | 21546762 | 159.03 | Loss | 0 | N | Y |
| 22 | 24043866 | 24255338 | 211.47 | Gain | 1 | Y | Y |
| 22 | 24113145 | 24240404 | 127.26 | Gain | 0 | N | Y |
| 22 | 31337616 | 31417223 | 79.61  | Gain | 1 | N | N |

Physical positions based on the May 2004 human genome assembly. The Database of Genomic Variants [39] and UCSC Genome Browser [38] were used to determine whether variants were previously reported. Rearrangements discussed in the manuscript are shown in red. \*We believe that an earlier report of a CNV including the deletion in 9152 was a false-positive (see general discussion)
